# Supplementary material for: Effects of Outpatient Aftercare on Psychiatric Rehospitalization Among Children and Emerging Adults in Alberta, Canada
Source: Atypon-hosted journal article supplement (doi:10.1176/appi.ps.201600211), 2017-03-01
Supplement: appi.ps.201600211.ds001.pdf [file appi.ps.201600211.ds001.pdf]

**Supplemental Table 1: Diagnostic Grouping Table 2012-2013**

| <b>Characteristic</b>                 | <b>DSM-IV Code</b>                                                                                                                                                                                                                                                          | <b>ICD-9-CM Code</b>                                                                                                                                                                                                                                                                                                                                                                                              | <b>ICD-10-CA Code</b>                                            |
|---------------------------------------|-----------------------------------------------------------------------------------------------------------------------------------------------------------------------------------------------------------------------------------------------------------------------------|-------------------------------------------------------------------------------------------------------------------------------------------------------------------------------------------------------------------------------------------------------------------------------------------------------------------------------------------------------------------------------------------------------------------|------------------------------------------------------------------|
| Organic disorder                      | 290.40–290.43, 293.0, 293.9,<br>294.0, 294.8, 294.10, 294.11,<br>294.9, 310.1, 780.09                                                                                                                                                                                       | 290.0, 290.10–290.13, 290.20–290.21,<br>290.3, 290.40–290.43, 290.8–290.9,<br>293.0, 293.1, 293.81–293.84, 293.89,<br>293.9, 294.0, 294.1, 294.8, 294.9                                                                                                                                                                                                                                                           | F00–F09, F53.1, G30, R41.3                                       |
| Substance use disorder                | 291.0–291.9, 292.0, 292.11,<br>292.12, 292.81, 292.82–<br>292.84, 292.85, 292.89, 292.9,<br>303.00, 303.90, 304.00,<br>304.10, 304.20, 304.30,<br>304.40, 304.50, 304.60,<br>304.80, 304.90, 305.1, 305.00,<br>305.20, 305.30, 305.40,<br>305.50, 305.60, 305.70,<br>305.90 | 291.0–291.5, 291.81, 291.89, 291.9,<br>292.0, 292.11–292.12, 292.2, 292.81–<br>292.84, 292.89, 292.9, 303.00–303.03,<br>303.90–303.93, 304.00–304.03, 304.10–<br>304.13, 304.20–304.23, 304.30–304.33,<br>304.40–304.43, 304.50–304.53, 304.60–<br>304.63, 304.70–304.73, 305.00–305.03,<br>305.1, 305.20–305.23, 305.30–305.33,<br>305.40–305.43, 305.50–305.53, 305.60–<br>305.63, 305.70–305.73, 305.80–305.83 | F10–F19, F55                                                     |
| Schizophrenic and psychotic disorders | 295.10, 295.20, 295.30,<br>295.40, 295.60, 295.70,<br>295.90, 298.8, 298.9, 297.1,<br>297.3, 293.81, 293.82                                                                                                                                                                 | 295.00–295.05, 295.10–295.15, 295.20–<br>295.25, 295.30–295.35, 295.40–295.45,<br>295.50–295.55, 295.60–295.65, 295.70–<br>295.75, 298.8, 298.9, 297.0–297.3,<br>297.8, 297.9, 298.0–298.4                                                                                                                                                                                                                        | F20–F29, R41.0                                                   |
| Mood disorders                        | 296.00–296.06, 296.40–<br>296.46, 296.50–296.56,<br>296.60–296.66, 296.7, 296.80,<br>296.89, 301.13, 296.20–<br>296.26, 296.30–296.36, 300.4,<br>311, 293.83, 296.90                                                                                                        | 296.00–296.06, 296.10–296.16, 296.40–<br>296.46, 296.50–296.56, 296.60–296.66,<br>296.7, 296.80–296.82, 296.89, 296.20–<br>296.26, 296.30–296.36, 300.4, 311,<br>296.90, 296.99                                                                                                                                                                                                                                   | F30–F31, F32–F33, F34.1, F53.0,<br>F34.0, F34.8, F34.9, F38, F39 |
| Anxiety disorders                     | 300.00–300.02, 300.21–                                                                                                                                                                                                                                                      | 300.00–300.02, 300.09, 300.20–300.23,                                                                                                                                                                                                                                                                                                                                                                             | F40–F42, F93.0–F93.2, F43.0,                                     |

Data Supplement for Cheng et al. (10.1176/appi.ps.201600211)

|                       |                                                                                                                                                                                                                                                                                                                                                                                                                                                           |                                                                                                                                                                                                                                                                                                                                                                                                                                                                                                                                                                                                                                                                                                                                                                                                                                 |                                                                                                                                                                                                      |
|-----------------------|-----------------------------------------------------------------------------------------------------------------------------------------------------------------------------------------------------------------------------------------------------------------------------------------------------------------------------------------------------------------------------------------------------------------------------------------------------------|---------------------------------------------------------------------------------------------------------------------------------------------------------------------------------------------------------------------------------------------------------------------------------------------------------------------------------------------------------------------------------------------------------------------------------------------------------------------------------------------------------------------------------------------------------------------------------------------------------------------------------------------------------------------------------------------------------------------------------------------------------------------------------------------------------------------------------|------------------------------------------------------------------------------------------------------------------------------------------------------------------------------------------------------|
|                       | 300.23, 300.29, 300.3, 309.21,<br>293.84, 293.89, 308.3, 309.81                                                                                                                                                                                                                                                                                                                                                                                           | 300.29, 300.3, 309.81, 308.0–308.4,<br>308.9                                                                                                                                                                                                                                                                                                                                                                                                                                                                                                                                                                                                                                                                                                                                                                                    | F43.1, F43.8, F43.9                                                                                                                                                                                  |
| Personality disorders | 301.0, 301.20, 301.22, 301.4,<br>301.50, 301.6, 301.7, 301.81–<br>301.83, 301.9                                                                                                                                                                                                                                                                                                                                                                           | 301.0, 301.10–301.13, 301.20–301.22,<br>301.3, 301.4, 301.50–301.51, 301.59,<br>301.6, 301.7, 301.81–301.84, 301.89,<br>301.9                                                                                                                                                                                                                                                                                                                                                                                                                                                                                                                                                                                                                                                                                                   | F60–F62, F68–F69                                                                                                                                                                                     |
| Other disorders       | 302.2–302.4, 302.70–302.76,<br>302.79, 302.81–302.85,<br>302.89, 302.9, 306.51, 607.84,<br>608.89, 625.0, 625.8, 300.12–<br>300.16, 300.19, 300.6, 300.11,<br>300.7, 300.81, 300.82, 307.1,<br>307.50, 307.51, 313.81,<br>313.82, 313.89, 313.9, 314.00,<br>314.01, 314.9, 315.00, 315.1,<br>315.2, 315.31, 315.32, 315.39,<br>315.4, 315.9, 317, 318.0–<br>318.2, 319, 307.42, 307.44–<br>307.47, 312.30–312.34,<br>312.39, 290.40–290.43, 316,<br>300.9 | 302.0–302.4, 302.50–302.53, 302.6,<br>302.70–302.76, 302.79, 302.81–302.85,<br>302.89, 302.9, 300.10–300.16, 300.19,<br>300.6, 300.7, 300.81–300.82, 300.89,<br>300.9, 307.80–307.81, 307.89, 307.1,<br>307.50–307.54, 307.59, 299.00–299.01,<br>299.10–299.11, 299.80–299.81, 299.90–<br>299.91, 307.20–307.23, 307.0, 307.3,<br>307.6, 307.7, 307.9, 309.21–309.22,<br>312.00–312.03, 312.10–312.13, 312.20–<br>312.23, 312.4, 312.81, 312.82, 312.89,<br>312.9, 313.0, 313.1, 313.21–313.23,<br>313.3, 313.81–313.83, 313.89, 313.9,<br>314.00–314.01, 314.1–314.2, 314.8–<br>314.9, 315.00–315.02, 315.09, 315.1,<br>315.2, 315.31–315.32, 315.39, 315.4,<br>315.5, 315.8, 315.9, 317, 318.0–318.2,<br>319, 307.40–307.49, 312.30–312.35,<br>312.39, 290.40–290.43, 310.0–310.2,<br>310.8, 310.9, 316, 300.5, 648.40–648.44 | F52, F64, F65, F66, F44, F48.1,<br>F45, F50, F70–F73, F78–F79, F80–<br>F89, F90, F91–F92, F93.0, F93.3,<br>F93.8–F93.9, F94, F95, F98, F51,<br>F63, F54, F48.0, F48.8, F48.9,<br>F53.8, F53.9, O99.3 |
